# Supplementary material for: Sustainable rare diseases business and drug access: no time for misconceptions
Source: PubMed Central journal article supplement (PMC3735431; doi:10.1186/1750-1172-8-109), 2013-07-23
Supplement: 1750-1172-8-109-S2.pdf [file 1750-1172-8-109-S2.pdf]

## Appendix 2 –Return on Investment simulation

| <b>Baseline benchmark</b>                                   | Base case e-IRR |              |
|-------------------------------------------------------------|-----------------|--------------|
| <b>Estimated late stage portoflio ROI (cost of capital)</b> | <b>11.0%</b>    | <b>14.0%</b> |
| R&D spend (M \$)                                            | \$65            | \$65         |
| Post tax earnings 10 y later                                | \$185           | \$241        |
| tax rate                                                    | 35%             | 35%          |
| 10 y Pre tax earnings (M \$)                                | \$284           | \$371        |
| trading margin (excl R&D)                                   | 40%             | 40%          |
| required incremental sales 10 years later(M \$)             | <b>\$473</b>    | <b>\$618</b> |

| <b>Rare diseases Simulation Case study</b>                                                          |                 |                 |
|-----------------------------------------------------------------------------------------------------|-----------------|-----------------|
| Estimated late stage portoflio ROI (cost of capital)                                                | <b>11.0%</b>    | <b>14.0%</b>    |
| Rare diseases companies annual R&D cumulated spend 2011 (M \$)(* )                                  | <b>\$2 871</b>  | <b>\$2 871</b>  |
| Post tax earnings 10 y later                                                                        | \$8 153         | \$10 645        |
| tax rate                                                                                            | 35%             | 35%             |
| 10 y Pre tax earnings (M \$)                                                                        | \$12 543        | \$16 376        |
| trading margin (excl R&D)                                                                           | 40%             | 40%             |
| required incremental sales 10 Y later                                                               | <b>\$20 905</b> | <b>\$27 294</b> |
| (*) Actelion, Alexion, Biomarin, Dyax, Enzon, Genzyme, Shire, Sobi, United Therapeutics, Viropharma |                 |                 |
| <b>Corresponding 10 y CAGR</b>                                                                      | <b>5%</b>       | <b>8%</b>       |
